# Supplementary material for: Biomacromolecular Profile in Human Primary Retinal Pigment Epithelial Cells—A Study of Oxidative Stress and Autophagy by Synchrotron-Based FTIR Microspectroscopy
Source: MDPI journal article supplement (doi:10.3390/biomedicines11020300), 2023-01-21
Supplement: s1 [file s1]

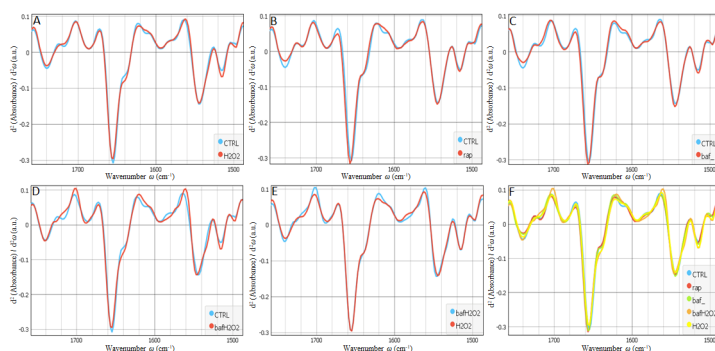

Figure S1: The second derivative of the average spectra of the protein and ester regions (1485–1760  $\text{cm}^{-1}$ ) in hRPE cells: (A) Control (untreated) vs.  $\text{H}_2\text{O}_2$ , (B) Control vs. Rap, (C) Control vs. Baf, (D) Control vs. Baf+ $\text{H}_2\text{O}_2$ , (E) Baf+ $\text{H}_2\text{O}_2$  vs.  $\text{H}_2\text{O}_2$ , and (F) all conditions are being shown. Representative data of number of cells per condition (N = 35–37 cells).

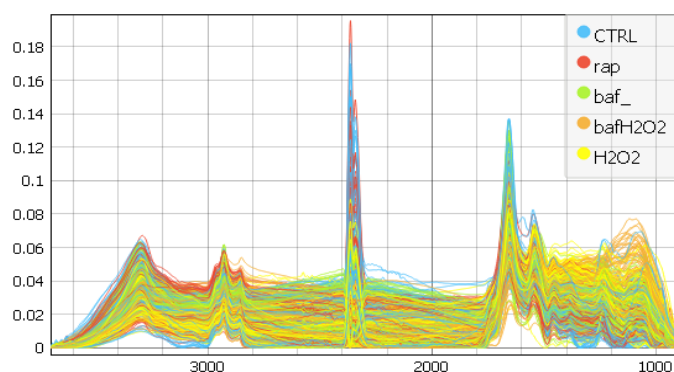

Figure S2: FTIR spectra of the cells, including the finger print (nucleic acids and carbohydrates), protein and ester regions, and lipid region in hRPEs: blue (Control), red (Rap), green (Baf), orange (Baf+ $\text{H}_2\text{O}_2$ ) and yellow ( $\text{H}_2\text{O}_2$ ). The band at  $2350 \text{ cm}^{-1}$  annotated carbon dioxide which is not relevant for our data. Representative data of the number of cells per condition (N = 35–37 cells) are being shown.

| Vibrational mode                                         | Wavenumber ( $\text{cm}^{-1}$ ) | Assignment                                   | Treatment of hRPEs |                        |     |     |                             |
|----------------------------------------------------------|---------------------------------|----------------------------------------------|--------------------|------------------------|-----|-----|-----------------------------|
|                                                          |                                 |                                              | control            | $\text{H}_2\text{O}_2$ | Rap | Baf | Baf+ $\text{H}_2\text{O}_2$ |
| $\text{CH}_2$ asymmetric stretch                         | 2956                            | Lipids and proteins                          |                    |                        |     |     |                             |
| $\text{CH}_2$ asymmetric stretch                         | 2924                            | Saturated lipids and side chains of proteins |                    |                        |     |     |                             |
| $\text{CH}_2$ symmetric stretch                          | 2853                            | Saturated lipids and side chains of proteins |                    |                        |     |     |                             |
| C=O stretch (ester)                                      | 1720-1740                       | Lipids, phospholipids                        |                    |                        |     |     |                             |
| C=O stretch+NH bend (Amide I)                            | 1656                            | Proteins— $\alpha$ -helix structure          |                    |                        |     |     |                             |
| Ring CC stretch of Tyr and Phe residues, and nucleotides | 1615                            | Proteins, nucleic acids                      |                    |                        |     |     |                             |
| NH bend+CH stretch (Amide II)                            | 1540                            | Proteins                                     |                    |                        |     |     |                             |
| Ring CC stretch of Tyr residues                          | 1517                            | Tyrosine proteins                            |                    |                        |     |     |                             |
| $\text{PO}_2^-$ asymmetric stretch                       | 1235                            | DNA                                          |                    |                        |     |     |                             |
| $\text{PO}_2^-$ symmetric stretch                        | 1089                            | Nucleic acids, phospholipids                 |                    |                        |     |     |                             |
| COH deformation                                          | 1050-1056                       | Mucin, carbohydrates                         |                    |                        |     |     |                             |
| Dianionic phosphate monoester                            | 970                             | Phosphorylated proteins                      |                    |                        |     |     |                             |

Table S1: Assignment of FTIR bands and their changes under different treatments of hRPEs with a colour-coded representation of the absorbance intensity (white-unchanged, green-increased and red-decreased).
